# Supplementary material for: Effect of postoperative systemic therapy on pulmonary adenocarcinoma with unexpected pleural spread detected during thoracotomy or thoracoscopy
Source: PubMed Central journal article supplement (PMC5797062; doi:10.18632/oncotarget.23686), 2017-12-26
Supplement: oncotarget-09-5435-s001.pdf [file oncotarget-09-5435-s001.pdf]

## Effect of postoperative systemic therapy on pulmonary adenocarcinoma with unexpected pleural spread detected during thoracotomy or thoracoscopy

### SUPPLEMENTARY MATERIALS

Supplementary Table 1: All study patients stratified by surgical approach method and surgical procedure

|             | Main tumor resection<br>(lobectomy or Wedge resection) | Diagnosis only | <i>P</i> value |
|-------------|--------------------------------------------------------|----------------|----------------|
| Thoracotomy | 64                                                     | 35             | 0.909          |
| VATS        | 23                                                     | 12             |                |

VATS: video-assisted thoracoscopic surgery.
